# Supplementary material for: Cell type-specific connectome predicts distributed working memory activity in the mouse brain
Source: eLife journal article supplement (doi:10.7554/elife.85442), 2023-12-18
Supplement: supp [file elife-85442-supp-v1.zip]

A(i)
