# Supplementary figures and images for: Cell type-specific connectome predicts distributed working memory activity in the mouse brain
Source: eLife journal article supplement (doi:10.7554/elife.85442), 2023-12-18

Target

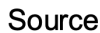Neuron density (cells/mm<sup>3</sup>)PV cell density (cells/mm<sup>3</sup>)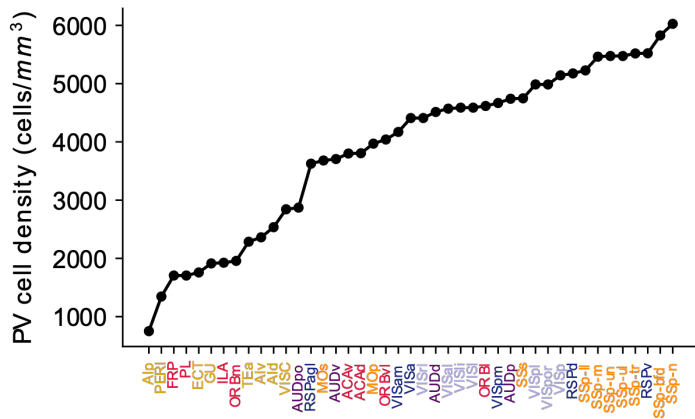

Supplement: supp [file elife-85442-supp-v1.zip]

A1

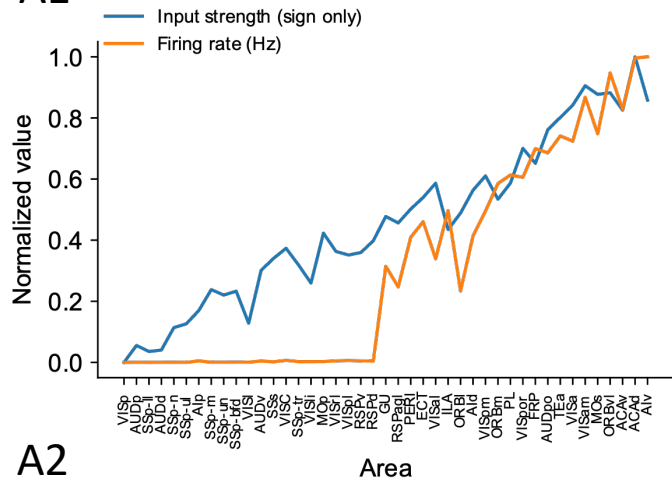

B1

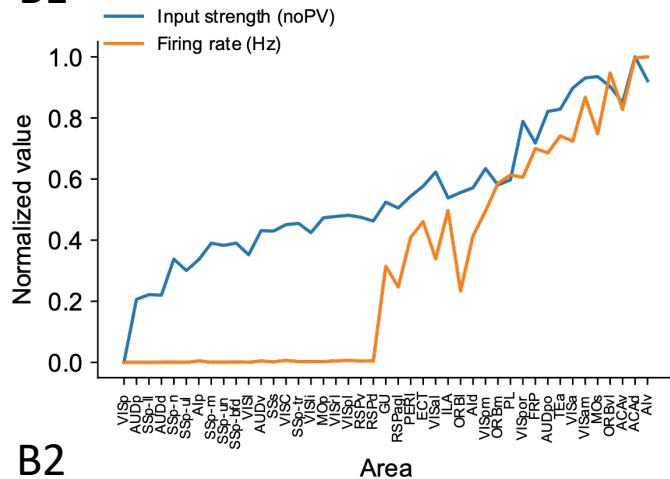

A2

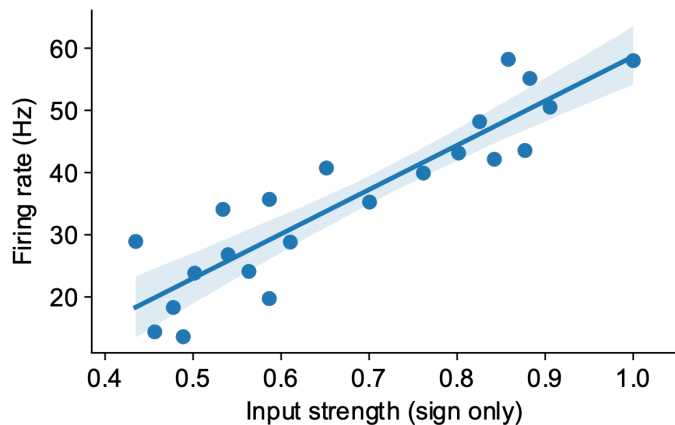

B2

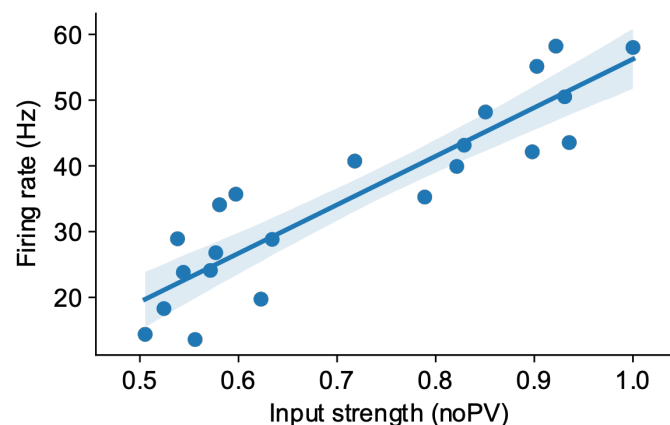

Supplement: supp [file elife-85442-supp-v1.zip]

A

Target area

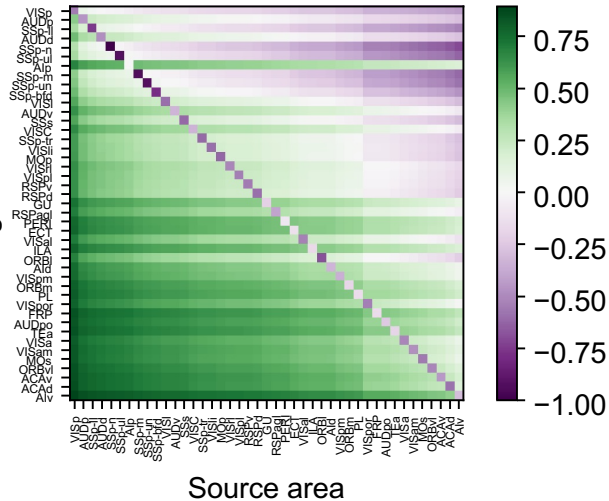

B

Target area

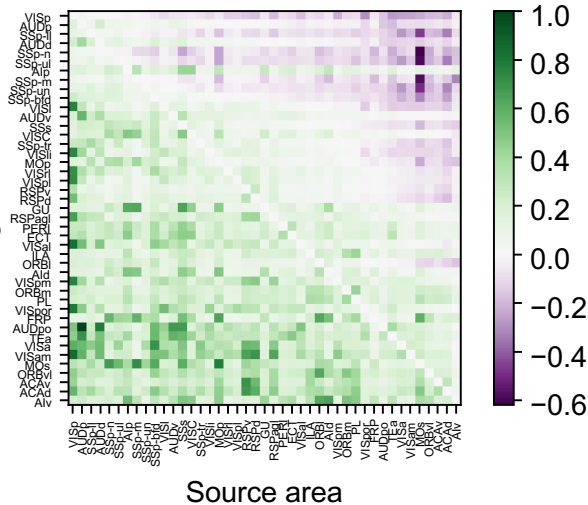

Supplement: supp [file elife-85442-supp-v1.zip]

A

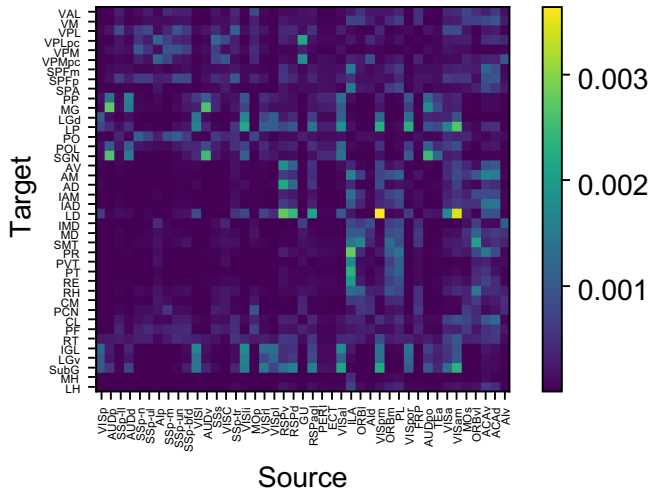

B

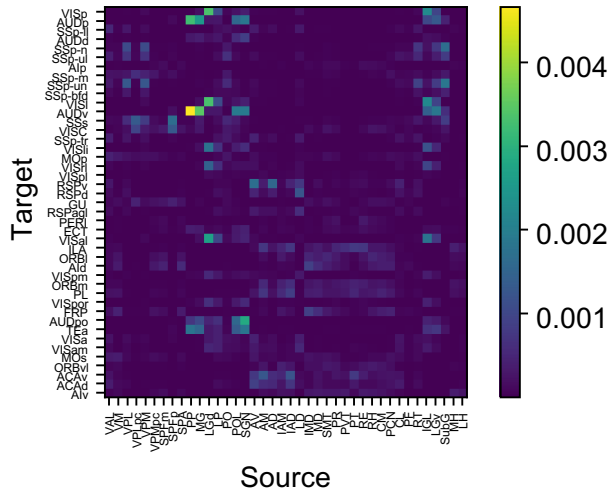

Supplement: supp [file elife-85442-supp-v1.zip]

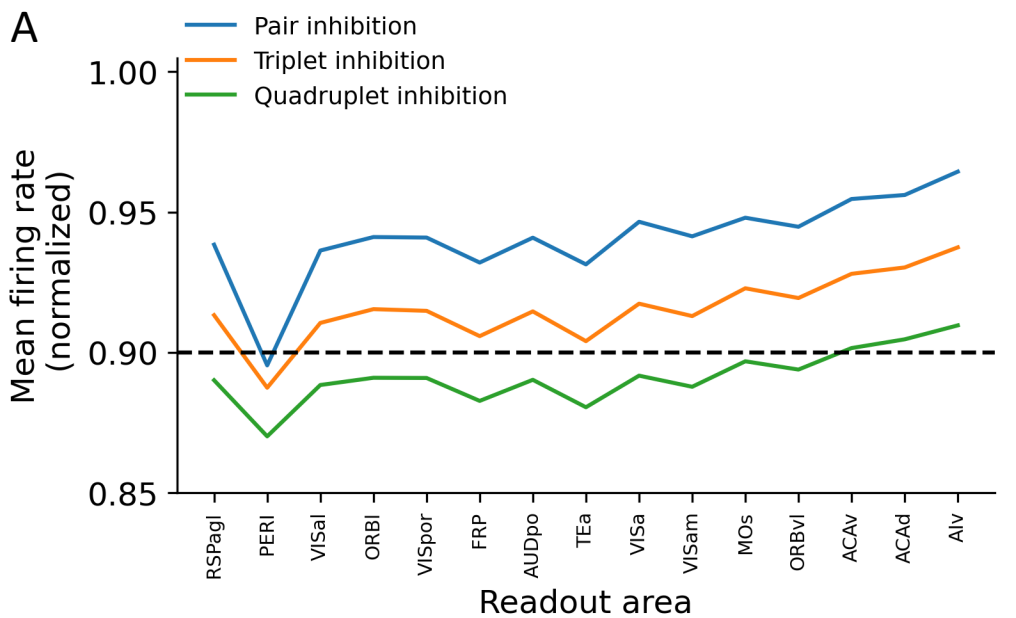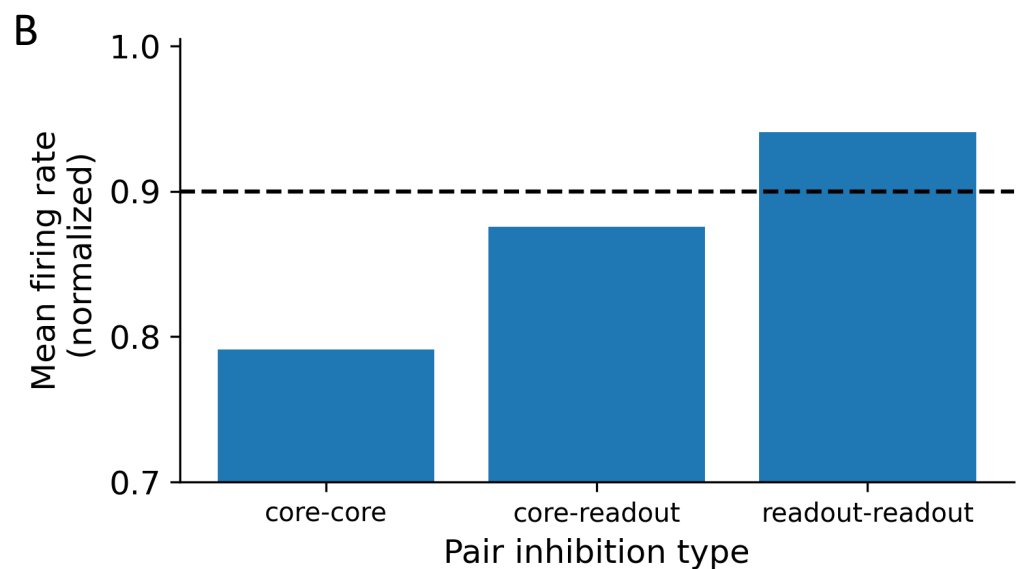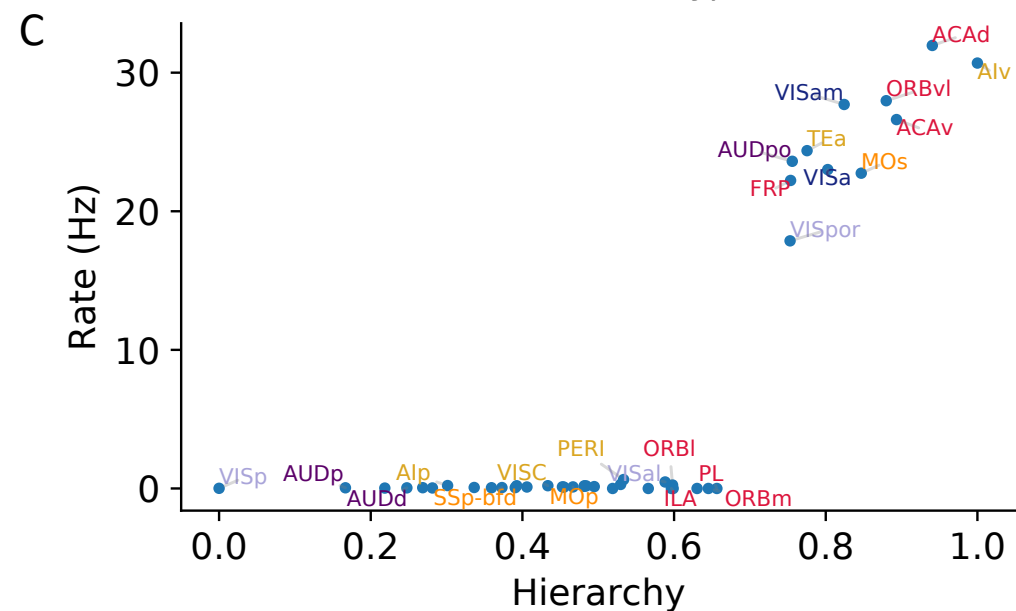

Supplement: supp [file elife-85442-supp-v1.zip]

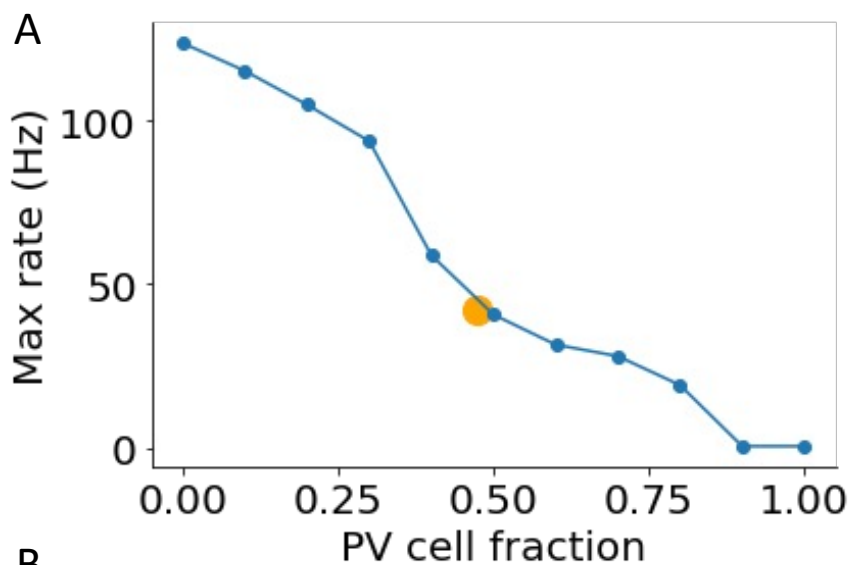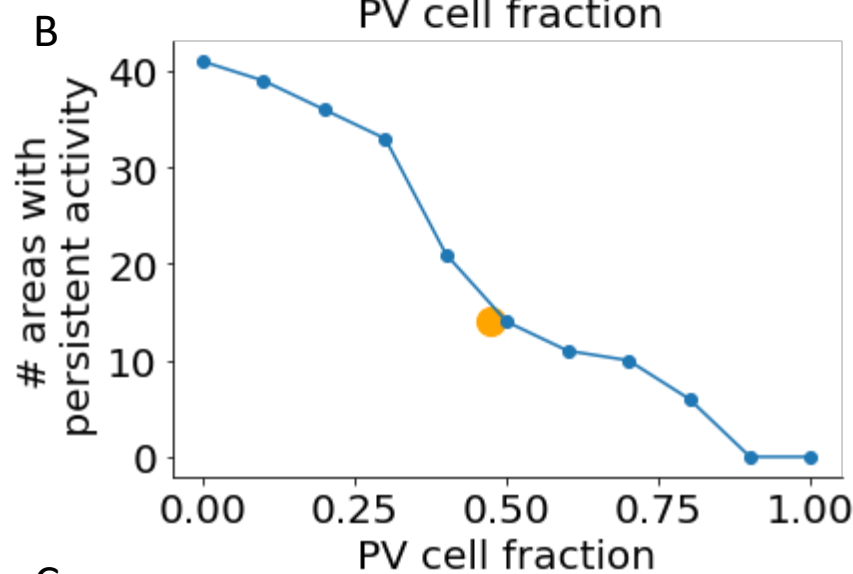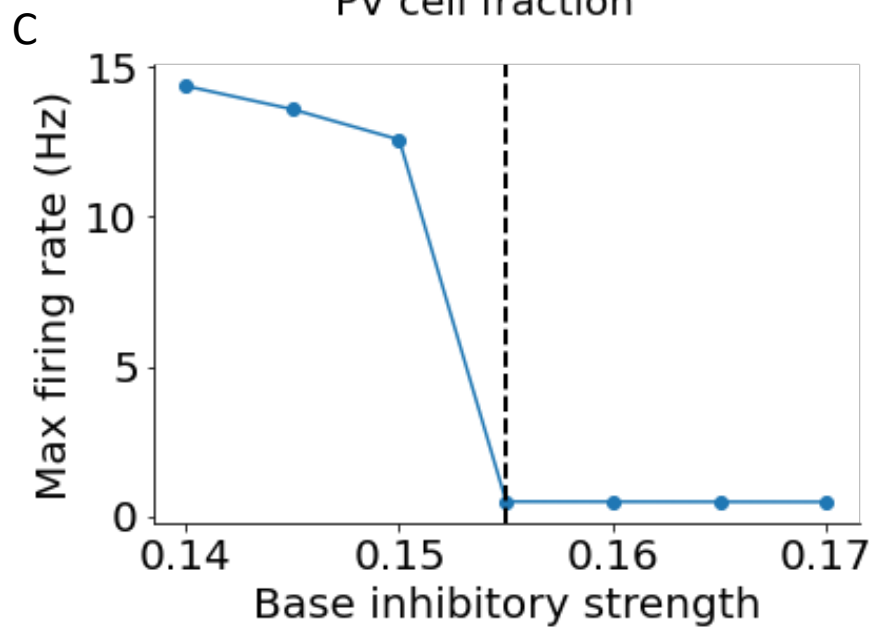

Supplement: supp [file elife-85442-supp-v1.zip]

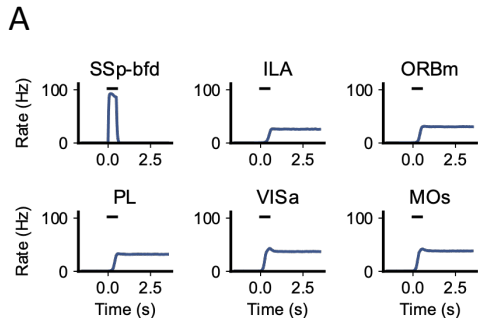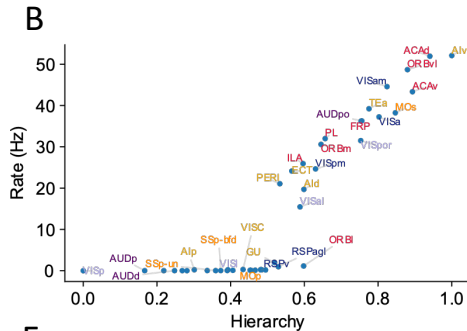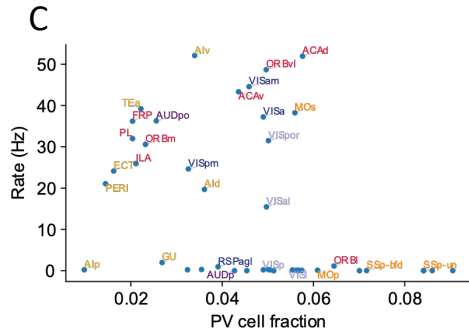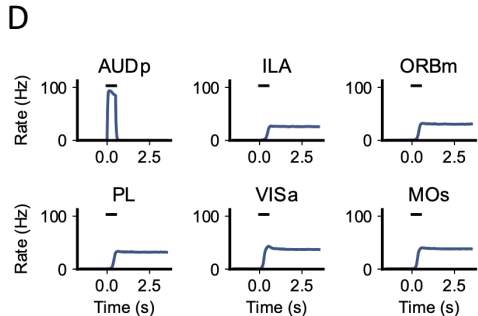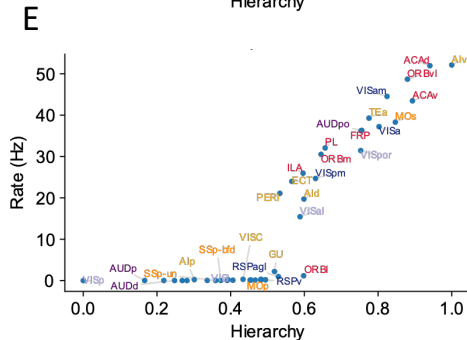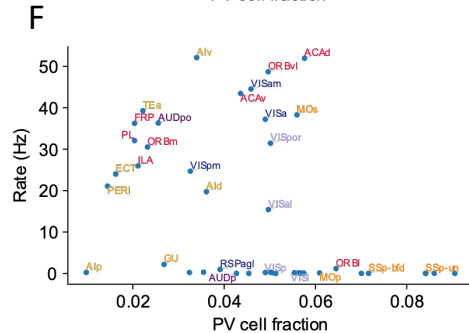

Supplement: supp [file elife-85442-supp-v1.zip]

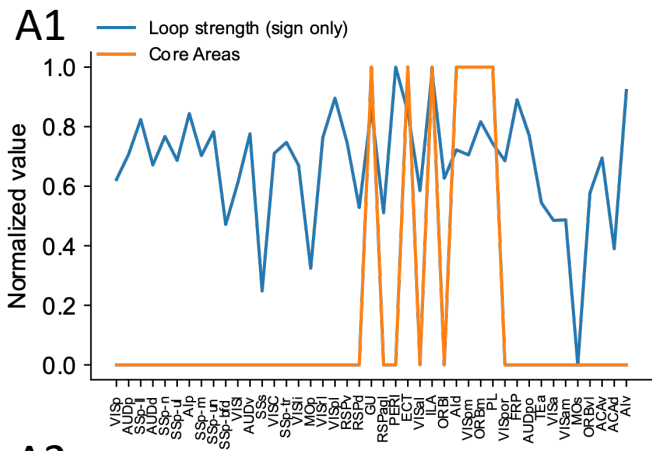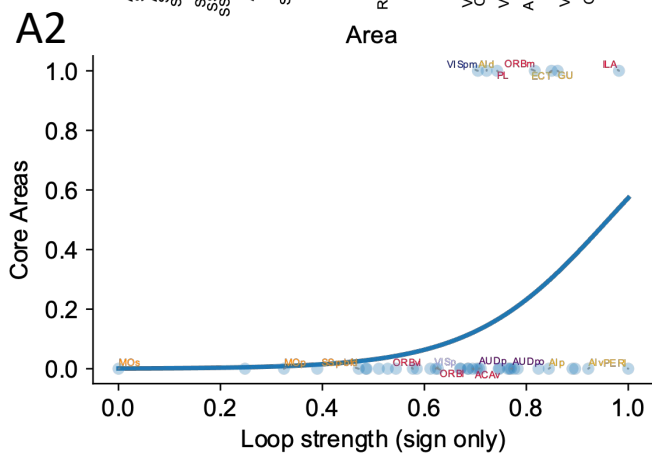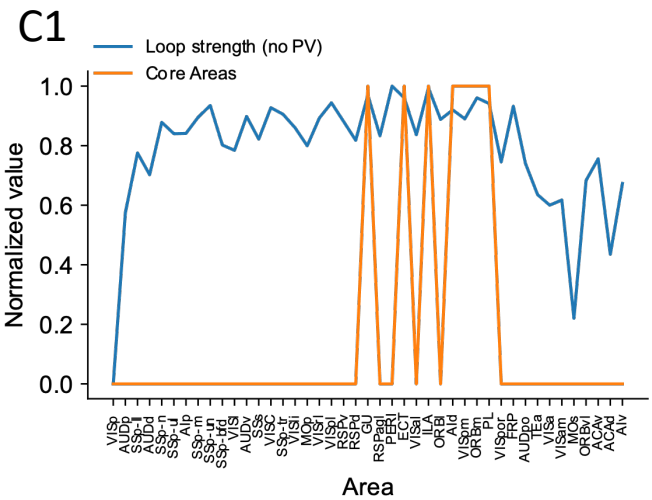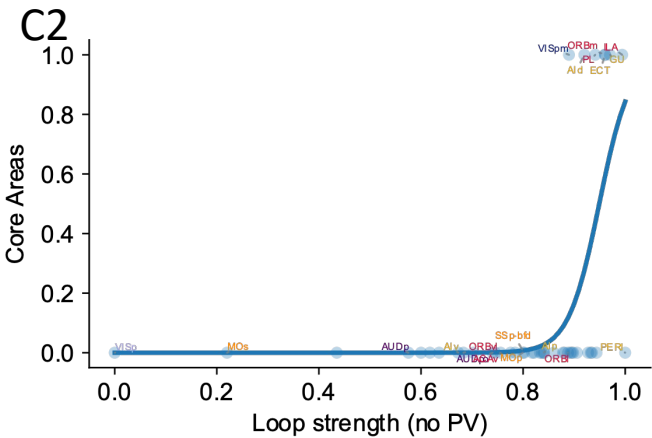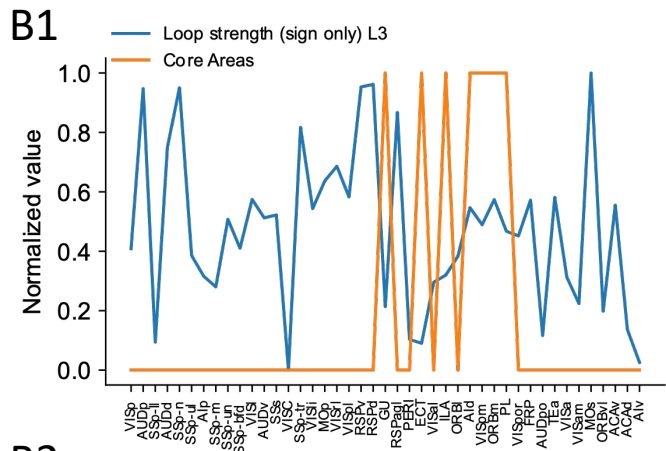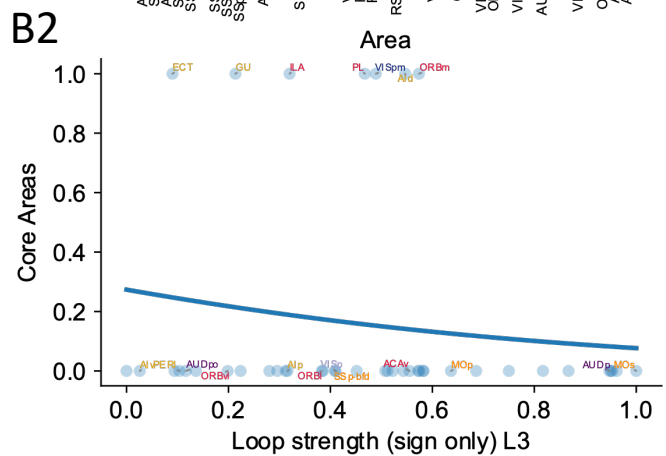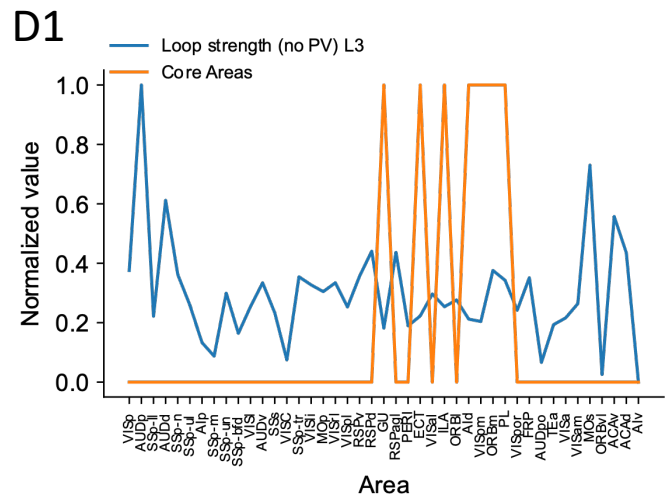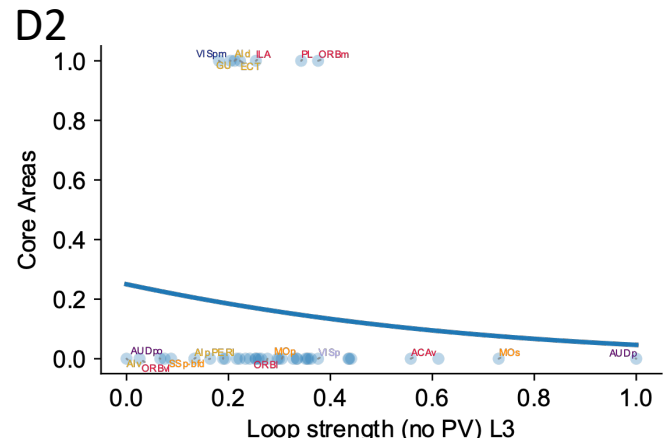

Supplement: supp [file elife-85442-supp-v1.zip]
